# Supplementary material
Source: PubMed Central journal article supplement (PMC1732774)
Supplement: jepicomh_58_5_361__3.pdf [file jepicomh_58_5_361__3.pdf]

Weblink 3: Policies of Australian universities on funding from the tobacco industry

### **Australian National University**

Policy: *Funding from the Tobacco Industry*

Approved: 1998 (Deputy Vice-Chancellor - Research)

1. Direct funding from foundations primarily funded by the tobacco industry will not be accepted.
2. Direct funding from business units of companies involved in the tobacco industry will not be accepted if, in the opinion of the Vice-Chancellor:
  - i) the unit is engaged directly in the production, manufacture, distribution, promotion or marketing of tobacco or tobacco products as its primary business; or
  - ii) acceptance of the funding involves any promotion or advertising that can be construed to support the tobacco industry or the tobacco lobby and its activities.
3. Acceptance of funding from business units of companies involved in the tobacco industry will be possible if, in the opinion of the Vice-Chancellor:
  - i) the primary business of the donor unit is unrelated to the tobacco industry; and
  - ii) acceptance of the funding cannot be construed to support the tobacco industry or the tobacco lobby and its activities.

### **Curtin University of Technology**

Policy: *Grants and Donations from Tobacco Companies*

Approved: 1994 (University Council)

1. The University dissociates itself and any of its activities from the tobacco industry.
2. The Academic Senate should approve appropriate guidelines that:
  - (a) ensure that direct funding from the tobacco industry is not accepted or administered by the University;
  - (b) allow discretionary acceptance of donations from companies and individuals associated with the tobacco industry provided that the donation is not made in the name of the tobacco industry and that the University Development Board is satisfied that the primary business of the donor unit is unrelated to the tobacco industry and acceptance of the funding cannot be construed to support the tobacco industry or the tobacco lobby and its activities.

### **Deakin University**

Policy: *Financial Arrangements with the Tobacco Industry*

Approved: 1998 (Academic Council)

1. Deakin University will not accept funding from the tobacco industry if the object of the grant is to provide benefits relating to the cultivation of tobacco, or to the manufacture or sale of tobacco products.
2. Deakin University will not undertake any development, consultancy or other services for tobacco industry organisations.
3. Deakin University will not enter into any commercial arrangements with any tobacco industry organisation to design, develop or deliver educational training or other knowledge-based services.
4. All proposals received by members of the University from the tobacco industry for funding or for fee-for-service arrangements must be referred to the Vice-Chancellor for consideration and determination.

### **Edith Cowan University**

Policy: *Tobacco Sponsorship and Promotion*

Approved: 1995 (Pro Vice-Chancellor - Research and Advancement)

1. The University will not do or allow anything which may directly or indirectly encourage or support the use of tobacco products.
2. The University will not
  - (a) accept sponsorship whether by payment of money or otherwise from; or
  - (b) enter into any association or other arrangement with any person known to be involved in or connected with the tobacco industry or any person who encourages or supports the use of tobacco products in any way, whether by direct funding, by advertising, by sponsorship, by the gift or loan of goods or services or by any other means.

### **Flinders University**

Policy: *Funding from the Tobacco Industry*

Approved: 1997 (University Council)

The University will not accept research or consultancy funding offered to the institution or to individual researchers which is known to be derived directly or indirectly, other than by taxation or government levies, from the tobacco industry, nor to advertise such grant opportunities.

### **Monash University**

Resolution of Council

Resolved: 1995

The University will cease to accept funding from the tobacco industry from 1 January 1996.

### **Murdoch University**

Resolutions of Senate

Resolved: 1992

1. That, until further decided by the Senate, the University not accept or permit the acceptance of direct funding for research or consultancy projects from the tobacco industry.
2. That the AVCC be informed of the Senate's resolution on this matter, together with the recommendation that all other Australian universities which had not taken a similar position be asked to consider doing so.

### **Northern Territory University**

Policy: *Principles and Procedures for Outside Work and Funding of External Activities*

Approved: 2000 (Vice-Chancellor)

Extract:

...Many projects for which funding from external sources are sought have ethical and other implications; this is particularly so for research projects, but may also be relevant for teaching and training related projects... In general, the University will not accept funds for projects or from sources where there is a potential to bring discredit on the institution. In particular, care should be exercised where there is a possibility of social sensitivity such as, for example, the funding of research projects by tobacco or alcohol companies.

### **University of Adelaide**

Policy: *Funding from the Tobacco Industry*

Approved: 1997 (Vice Chancellor)

The University of Adelaide will not accept research funding offered to the institution or to individual researchers by the tobacco industry\* nor will it advertise such grant opportunities.

\*excluding tobacco taxes applied by governments to support health and welfare related projects.

### **University of Ballarat**

Policy: *Sponsorship of the University of Ballarat by External Organisations*

Approved: 2002 (University Council)

Extract

...Sponsorship (of the University of Ballarat) means a transaction between the University of Ballarat and another organisation whereby financial or in kind assistance is provided to the University of Ballarat towards goods, services, activities or events in return for promotion or advertisement of a product or service of that organisation by the University of Ballarat. ...All sponsorship proposals must be conveyed in the first instance to the Pro-Vice-Chancellor (Administrative and Academic Support), although subsequent negotiations may be delegated, with final approval being the responsibility of the Vice-Chancellor. ...The following types of proposals will not be sponsored:

...Sponsorship proposals from organisations or enterprises linked with tobacco, alcohol or other products which could prove controversial or divisive.

### **University of Melbourne**

Resolution of University Council

Resolved: 1997

From a date not later than 1 January 1998, the University will not accept research grants from the Tobacco Industry.

### **University of South Australia**

Policy: *Research Funded by Tobacco Companies*

Approved: 1998 (University Council)

1. The University will not accept funding from tobacco related sources for health research.
2. The University will not accept funding from tobacco related sources for health-related research.

3. The University will not accept funding from tobacco related sources for non-health related research, except in exceptional circumstances.
  - i) The acceptance of any funding from tobacco related sources for non-health related research requires the prior approval of the Vice Chancellor.
  - ii) A requirement of the acceptance of any such funding is that the University will retain responsibility for and control of the publishing of the research results.
  - iii) Staff wishing to apply for funding from any tobacco related source for non-health related research should initially discuss their application with the Pro Vice Chancellor (Research and International) prior to making any submission.

For the purpose of this policy, a tobacco related source is defined as a member of the tobacco industry and includes the Tobacco Institute as well as individual companies, or their component parts, whose primary business is the manufacture, distribution, promotion and sale of tobacco and related products.

### **The University of Newcastle**

Policy: *Tobacco Funding*

Approved: 1997 (University Council)

The University will not accept tobacco industry funding for any university purpose.

### **University of Sydney**

Policy: *Tobacco Company Funding*

Approved: 1982 (University Senate)

The University and its Departments will not accept support from Rothmans or any other tobacco company that involves the nomination of the company as the source of the support.

### **University of Technology Sydney**

Policy: *Research funding by the tobacco industry*

Approved: 1995 (University Council)

The University notes the growing body of scientific evidence that smoking is harmful to human health and will not seek or accept funding for any activity that will enhance the marketing of tobacco products.

### **University of Western Australia**

Policy: *Guidelines for the receipt of funding from companies involved with the tobacco industry*

Approved: 1994 (University Senate)

1. Direct funding from the Australian Tobacco Research Foundation, the Rothmans Foundation and the Tobacco R&D Council will not be accepted for any purpose.
2. Direct funding from business units of companies involved in the tobacco industry will not be accepted if, in the opinion of the Vice-Chancellor,
  - i) the unit is engaged directly in the production, manufacture, distribution, promotion or marketing of tobacco or tobacco products as its primary business; or
  - ii) acceptance of the funding involves any promotion or advertising that can be construed to support the tobacco industry or the tobacco lobby and its activities.
3. Acceptance of funding from business units of companies involved in the tobacco industry will be possible if, in the opinion of the Vice-Chancellor,

- i) the primary business of the donor unit is unrelated to the tobacco industry; and
- ii) acceptance of the funding cannot be construed to support the tobacco industry or the tobacco lobby and its activities.

### **University of Wollongong**

Policy: *Tobacco Industry Funding*

Approved: 2002 (University Research Committee)

The University of Wollongong will not accept funding from the tobacco industry for any purpose.

#### **Other Research Bodies:**

##### **National Heart Foundation**

##### *Funding from the Tobacco Industry:*

The individuals, research groups or research institutions associated with a Heart Foundation grant or award shall not accept any money by way of research grants, consultancies or sponsorships from the tobacco industry or persons connected with the tobacco industry. This includes direct funding, as well as advertising, sponsorship, gifts or loan of goods or services, or funding by any other means.
